# Supplementary material
Source: Springer Nature journal article supplement (https://www.springermedizin.de/resource/supplementary/40001_2014_147_MOESM1_ESM.pdf/9685318)

A

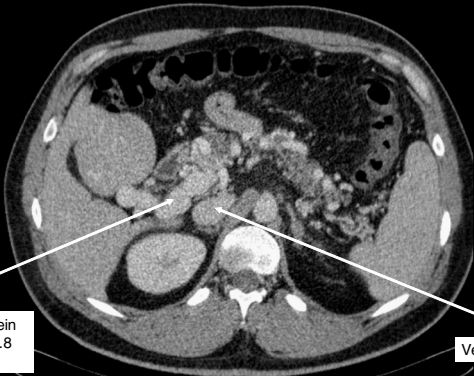

Collateral vein  
paracaval 1.8  
cm

Vena cava inferior

P

Supplement: MOESM1 [file 9685318]
